# Supplementary material for: Data-driven system to predict academic grades and dropout
Source: PLoS One. 2017 Feb 14;12(2):e0171207. doi: 10.1371/journal.pone.0171207 (PMC5308611; doi:10.1371/journal.pone.0171207)
Supplement: S1 File — Grades of students from Mathematics and Computer Science degrees (2009–2014) in CSV format file. (CSV) [file pone.0171207.s008.csv]

	any_matriculacio_assig	id_alumne	id_enseny	id_assig	nota
0	2011	1	G1042	360134	0.0
1	2011	1	G1042	360135	0.0
2	2011	1	G1042	360136	0.0
3	2011	1	G1042	360137	0.0
4	2011	1	G1042	360138	0.0
5	2011	1	G1042	360139	0.0
6	2011	1	G1042	360140	0.0
7	2011	1	G1042	360141	0.0
8	2011	1	G1042	360142	0.0
9	2011	1	G1042	360143	0.0
10	2012	2	G1042	360134	0.0
11	2012	2	G1042	360135	0.0
12	2012	2	G1042	360138	0.0
13	2012	2	G1042	360139	0.0
14	2012	2	G1042	360142	0.0
15	2010	3	G1042	360136	7.5
16	2010	3	G1042	360137	8.9
17	2010	3	G1042	360142	7.0
18	2010	3	G1042	360143	0.0
19	2011	3	G1042	360139	0.0
20	2011	3	G1042	360134	0.0
21	2011	3	G1042	360138	8.0
22	2011	3	G1042	360140	7.0
23	2011	3	G1042	360141	0.0
24	2011	3	G1042	360143	0.0
25	2011	3	G1042	360135	0.0
28	2010	4	G1077	364299	0.0
29	2010	4	G1077	364293	0.0
30	2010	4	G1077	364288	0.0
31	2010	4	G1077	364301	0.0
32	2010	4	G1077	364290	0.0
33	2010	4	G1077	364298	1.3
34	2011	4	G1077	364288	0.0
35	2011	4	G1077	364290	0.0
36	2011	4	G1077	364293	0.0
37	2011	4	G1077	364298	1.7
38	2011	4	G1077	364299	0.0
39	2011	5	G1042	360143	5.5
40	2011	5	G1042	360140	4.5
41	2011	5	G1042	360142	6.0
42	2011	5	G1042	360141	6.2
43	2011	5	G1042	360136	3.8
44	2011	5	G1042	360137	6.3
45	2012	5	G1042	360140	9.2
46	2012	5	G1042	360134	7.0
47	2012	5	G1042	360135	5.9
48	2012	5	G1042	360136	6.4
49	2012	5	G1042	360139	6.6
50	2012	5	G1042	360138	8.2
51	2013	5	G1042	360144	4.3
52	2013	5	G1042	360145	4.5
53	2013	5	G1042	360146	5.7
54	2013	5	G1042	360148	0.0
55	2013	5	G1042	360151	0.0
56	2013	5	G1042	360153	6.6
59	2011	6	G1042	360134	0.0
60	2011	6	G1042	360135	0.0
61	2011	6	G1042	360136	0.0
62	2011	6	G1042	360137	4.2
63	2011	6	G1042	360138	6.4
64	2011	6	G1042	360139	0.0
65	2011	6	G1042	360140	7.0
66	2011	6	G1042	360141	7.2
67	2011	6	G1042	360142	7.0
68	2011	6	G1042	360143	0.5
69	2012	6	G1042	360161	7.0
70	2012	6	G1042	360150	8.0
71	2012	6	G1042	360146	2.0
72	2012	6	G1042	360155	0.0
73	2012	6	G1042	360134	0.0
74	2012	6	G1042	360135	2.1
75	2012	6	G1042	360137	5.5
76	2012	6	G1042	360139	4.2
77	2012	6	G1042	360144	0.0
78	2012	6	G1042	360145	0.0
79	2012	7	G1042	360134	7.5
80	2012	7	G1042	360135	5.6
81	2012	7	G1042	360138	8.6
82	2012	7	G1042	360139	6.9
83	2012	7	G1042	360142	7.3
84	2013	7	G1042	360141	8.8
85	2013	7	G1042	360136	5.9
86	2013	7	G1042	360140	7.6
87	2013	7	G1042	360143	6.4
88	2013	7	G1042	360137	9.0
89	2010	8	G1077	364299	0.0
90	2010	8	G1077	364290	0.0
91	2010	8	G1077	364298	2.2
92	2010	8	G1077	364294	0.0
93	2010	8	G1077	364301	0.0
94	2010	8	G1077	364291	0.0
95	2010	8	G1077	364292	0.0
96	2010	8	G1077	364293	0.0
97	2010	8	G1077	364289	0.8
98	2010	8	G1077	364288	0.0
99	2012	8	G1077	364298	2.4
100	2012	8	G1077	364288	8.2
101	2012	8	G1077	364294	0.0
102	2012	8	G1077	364299	0.0
103	2012	8	G1077	364292	0.0
104	2013	8	G1077	364291	0.0
105	2013	8	G1077	364298	0.0
106	2013	8	G1077	364299	0.0
113	2010	9	G1077	364291	7.0
114	2010	9	G1077	364288	7.0
115	2010	9	G1077	364298	8.0
116	2010	9	G1077	364301	7.1
117	2010	9	G1077	364290	5.7
118	2010	9	G1077	364299	8.6
119	2011	9	G1077	364293	7.3
120	2011	9	G1077	364294	6.2
121	2011	9	G1077	364295	6.6
122	2011	9	G1077	364300	0.0
123	2012	9	G1077	364289	10.0
124	2012	9	G1077	364292	8.8
125	2012	9	G1077	364296	7.8
126	2012	9	G1077	364300	9.0
127	2012	9	G1077	364302	7.1
128	2012	9	G1077	364304	9.0
129	2012	9	G1077	364306	8.1
130	2013	9	G1077	364314	7.5
131	2013	9	G1077	364322	8.8
132	2013	9	G1077	364328	8.0
133	2013	9	G1077	364307	9.0
134	2013	9	G1077	364312	7.6
135	2013	9	G1077	364297	8.9
136	2013	9	G1077	364305	8.0
137	2013	9	G1077	364311	0.0
138	2013	9	G1077	364303	0.0
139	2009	10	G1042	360134	2.8
140	2009	10	G1042	360142	6.3
141	2009	10	G1042	360139	0.0
142	2009	10	G1042	360138	3.7
143	2009	10	G1042	360135	0.0
144	2010	10	G1042	360134	0.0
145	2010	10	G1042	360135	0.0
146	2010	10	G1042	360136	0.0
147	2010	10	G1042	360138	1.6
148	2010	10	G1042	360139	0.0
149	2010	10	G1042	360140	0.0
172	2009	11	G1077	364299	6.7
173	2009	11	G1077	364301	4.0
174	2009	11	G1077	364288	5.6
175	2009	11	G1077	364293	4.7
176	2009	11	G1077	364298	6.6
177	2010	11	G1077	364302	6.5
178	2010	11	G1077	364293	6.2
179	2010	11	G1077	364300	7.0
180	2010	11	G1077	364301	5.1
181	2010	11	G1077	364303	5.0
182	2010	11	G1077	364297	6.7
183	2010	11	G1077	364305	5.2
184	2010	11	G1077	364295	0.0
185	2010	11	G1077	364296	3.9
186	2010	11	G1077	364304	7.0
187	2010	11	G1077	360022	7.5
188	2010	11	G1077	364307	0.0
189	2011	11	G1077	364307	6.6
190	2011	11	G1077	364295	8.7
191	2011	11	G1077	364296	7.8
192	2011	11	G1077	364309	4.0
193	2011	11	G1077	364310	6.2
194	2011	11	G1077	364311	9.0
195	2011	11	G1077	364313	8.0
196	2011	11	G1077	364314	7.0
197	2011	11	G1077	364315	7.4
198	2011	11	G1077	364322	8.5
199	2012	11	G1077	364312	0.0
200	2012	11	G1077	364308	7.4
201	2012	11	G1077	364316	6.9
202	2012	11	G1077	364318	8.7
203	2012	11	G1077	364321	8.0
204	2012	11	G1077	364323	6.5
205	2012	11	G1077	364325	7.6
206	2012	11	G1077	364326	9.0
207	2012	11	G1077	364328	4.0
208	2012	11	G1077	364309	5.5
209	2013	11	G1077	364312	5.7
210	2013	11	G1077	364317	0.0
211	2013	11	G1077	364317	9.0
212	2013	11	G1077	364328	6.0
214	2011	12	G1077	364290	0.0
215	2011	12	G1077	364292	5.3
216	2011	12	G1077	364293	0.0
217	2011	12	G1077	364298	5.0
218	2012	12	G1077	364291	0.0
219	2012	12	G1077	364290	0.0
220	2012	12	G1077	364293	0.0
221	2012	12	G1077	364294	2.7
222	2012	12	G1077	364304	8.5
223	2012	12	G1077	364289	0.0
224	2011	12	G1077	364299	6.0
225	2011	12	G1077	364288	6.0
237	2011	13	G1042	360136	8.8
238	2011	13	G1042	360138	9.5
239	2011	13	G1042	360139	10.0
240	2011	13	G1042	360161	7.5
241	2012	13	G1042	360155	0.0
242	2012	13	G1042	360144	7.9
243	2012	13	G1042	360145	8.3
244	2012	13	G1042	360148	5.4
245	2012	13	G1042	360150	10.0
246	2013	13	G1042	360152	9.0
247	2013	13	G1042	360151	7.1
248	2013	13	G1042	360618	7.3
249	2013	13	G1042	360146	7.3
250	2010	14	G1042	360135	0.0
251	2010	14	G1042	360134	0.0
252	2010	14	G1042	360138	9.3
253	2010	14	G1042	360140	8.6
254	2010	14	G1042	360141	7.6
255	2011	14	G1042	360136	1.7
256	2011	14	G1042	360135	0.0
257	2011	14	G1042	360137	0.0
258	2011	14	G1042	360142	4.0
259	2011	14	G1042	360134	0.0
260	2011	15	G1077	364288	5.0
261	2011	15	G1077	364289	0.0
262	2011	15	G1077	364290	8.4
263	2011	15	G1077	364291	8.4
264	2011	15	G1077	364292	8.6
265	2011	15	G1077	364293	8.1
266	2011	15	G1077	364294	5.2
267	2011	15	G1077	364298	6.7
268	2011	15	G1077	364299	7.5
269	2011	15	G1077	364301	6.0
270	2012	15	G1077	364296	8.3
271	2012	15	G1077	364297	5.9
272	2012	15	G1077	364300	9.0
273	2012	15	G1077	364302	8.0
274	2012	15	G1077	364303	6.0
275	2012	15	G1077	364304	10.0
276	2012	15	G1077	364306	7.5
277	2012	15	G1077	364307	7.7
278	2012	15	G1077	364295	9.6
279	2012	15	G1077	364289	10.0
280	2013	15	G1077	364305	7.5
281	2013	15	G1077	364308	8.6
282	2013	15	G1077	364310	10.0
283	2013	15	G1077	364314	8.0
284	2013	15	G1077	364311	7.1
285	2013	15	G1077	364315	7.9
286	2013	15	G1077	364322	7.2
287	2013	15	G1077	364323	6.5
288	2013	15	G1077	364328	6.2
289	2013	15	G1077	364312	8.0
302	2010	16	G1042	360141	5.0
303	2010	16	G1042	360145	7.5
304	2010	16	G1042	360146	6.0
305	2010	16	G1042	360151	8.4
306	2010	16	G1042	360150	7.8
307	2010	16	G1042	360139	9.0
308	2011	16	G1042	360147	5.0
309	2011	16	G1042	360152	7.0
310	2011	16	G1042	360155	5.9
311	2011	16	G1042	360158	6.0
312	2011	16	G1042	360161	7.7
313	2011	16	G1042	360148	5.7
314	2012	16	G1042	360157	7.2
315	2012	16	G1042	360156	10.0
316	2012	16	G1042	360160	9.2
317	2012	16	G1042	360162	8.0
318	2012	16	G1042	360163	0.0
319	2012	16	G1042	399131	7.5
320	2012	16	G1042	360149	6.5
321	2013	16	G1042	364304	8.5
322	2013	16	G1042	360163	6.4
323	2013	16	G1042	364298	7.9
324	2013	16	G1042	364303	6.5
325	2013	16	G1042	364314	6.7
326	2013	16	G1042	364300	7.1
327	2009	17	G1042	360140	0.0
328	2009	17	G1042	360139	0.0
329	2009	17	G1042	360138	0.0
330	2009	17	G1042	360135	0.0
331	2009	17	G1042	360134	0.0
337	2009	18	G1042	360136	3.9
338	2009	18	G1042	360135	0.0
339	2009	18	G1042	360140	4.4
340	2009	18	G1042	360139	0.0
341	2009	18	G1042	360138	5.3
342	2009	18	G1042	360137	0.0
343	2010	18	G1042	360144	0.0
344	2010	18	G1042	360150	7.6
345	2010	18	G1042	360135	1.8
346	2010	18	G1042	360136	5.5
347	2010	18	G1042	360137	5.0
348	2010	18	G1042	360139	4.7
349	2010	18	G1042	360140	6.1
350	2010	18	G1042	360141	3.5
351	2010	18	G1042	360143	3.5
352	2010	18	G1042	360148	0.0
353	2011	18	G1077	364293	0.0
354	2011	18	G1077	364289	0.0
355	2011	18	G1077	364290	0.0
356	2011	18	G1077	364292	0.0
357	2011	18	G1077	364294	0.0
358	2011	18	G1077	364298	0.5
359	2011	18	G1077	364299	0.0
360	2011	18	G1077	364301	0.0
361	2012	18	G1077	364298	2.2
362	2012	18	G1077	364299	0.0
363	2012	18	G1077	364301	0.0
364	2012	18	G1077	364305	0.0
365	2012	18	G1077	364293	0.0
366	2012	18	G1077	364297	0.0
367	2012	18	G1077	364289	0.0
368	2012	18	G1077	364290	0.0
369	2012	18	G1077	364292	6.0
370	2012	18	G1077	364294	0.0
381	2009	19	G1042	360138	9.2
382	2009	19	G1042	360142	9.3
383	2009	19	G1042	360141	6.0
384	2009	19	G1042	360139	6.0
385	2010	19	G1042	360155	6.0
386	2010	19	G1042	360146	5.5
387	2010	19	G1042	360148	7.0
388	2010	19	G1042	360150	7.7
389	2010	19	G1042	360151	6.0
390	2010	19	G1042	360153	7.0
391	2010	19	G1042	360161	6.6
392	2010	19	G1042	360152	5.0
393	2011	19	G1042	360154	6.6
394	2011	19	G1042	360156	6.7
395	2011	19	G1042	399101	5.3
396	2011	19	G1042	399102	7.2
397	2011	19	G1042	399103	5.2
398	2012	19	G1042	360162	6.6
399	2012	19	G1042	360147	8.0
400	2012	19	G1042	360149	5.0
401	2012	19	G1042	360157	7.0
402	2012	19	G1042	360158	5.1
403	2012	19	G1042	360160	6.9
404	2012	19	G1042	360163	6.3
405	2012	19	G1042	363031	7.0
406	2012	19	G1042	364204	9.3
407	2012	19	G1042	360159	7.8
408	2009	20	G1077	364290	0.0
409	2009	20	G1077	364299	0.0
410	2009	20	G1077	364298	4.0
411	2009	20	G1077	364294	0.0
412	2009	20	G1077	364288	0.0
413	2009	20	G1077	364289	0.0
414	2009	20	G1077	364293	0.0
415	2009	20	G1077	364292	2.6
416	2009	20	G1077	364291	0.0
417	2009	20	G1077	364301	0.0
422	2010	21	G1042	360143	5.8
423	2010	21	G1042	360141	2.7
424	2010	21	G1042	360140	5.4
425	2010	21	G1042	360142	5.3
426	2010	21	G1042	360138	7.1
427	2010	21	G1042	360139	5.0
428	2011	21	G1042	360150	2.7
429	2011	21	G1042	360151	0.0
430	2011	21	G1042	360152	0.0
431	2011	21	G1042	360153	2.9
432	2011	21	G1042	360155	1.3
433	2011	21	G1042	360158	0.0
434	2011	21	G1042	360161	0.0
435	2011	21	G1042	360144	1.5
436	2011	21	G1042	360148	0.0
437	2011	21	G1042	360145	5.1
438	2011	21	G1042	360141	6.5
439	2011	23	G1077	364294	10.0
440	2011	23	G1077	364288	7.0
441	2011	23	G1077	364289	0.0
442	2011	23	G1077	364290	6.7
443	2011	23	G1077	364291	0.0
444	2011	23	G1077	364293	3.7
445	2011	23	G1077	364298	5.7
446	2011	23	G1077	364299	0.0
447	2011	23	G1077	364301	6.0
448	2011	23	G1077	364292	7.4
449	2012	23	G1077	364302	8.9
450	2012	23	G1077	364305	7.7
451	2012	23	G1077	364306	0.0
452	2012	23	G1077	364307	7.6
453	2012	23	G1077	364297	7.3
454	2012	23	G1077	364295	0.0
455	2012	23	G1077	364299	5.0
456	2012	23	G1077	364289	0.0
457	2012	23	G1077	364291	8.5
458	2012	23	G1077	364293	7.7
459	2013	23	G1077	364322	0.0
460	2013	23	G1077	364315	0.0
461	2013	23	G1077	364328	0.0
462	2013	23	G1077	364289	7.4
463	2013	23	G1077	364295	7.7
464	2013	23	G1077	364296	3.1
465	2013	23	G1077	364300	0.0
466	2013	23	G1077	364303	7.4
467	2013	23	G1077	364304	0.0
468	2013	23	G1077	364306	0.0
482	2010	24	G1077	364301	7.4
483	2010	24	G1077	364293	3.1
484	2010	24	G1077	364289	6.5
485	2010	24	G1077	364298	6.4
486	2010	24	G1077	364299	4.7
487	2011	24	G1077	364293	6.0
488	2011	24	G1077	364295	9.8
489	2011	24	G1077	364299	1.4
490	2011	24	G1077	364297	2.7
491	2011	24	G1077	364300	5.0
492	2011	24	G1077	364302	1.1
493	2011	24	G1077	364303	2.2
494	2011	24	G1077	364304	8.0
495	2011	24	G1077	364305	0.7
496	2011	24	G1077	364306	6.5
497	2011	24	G1077	364307	2.6
498	2012	24	G1077	364305	3.4
499	2012	24	G1077	364296	5.2
500	2012	24	G1077	364297	4.5
501	2012	24	G1077	364299	5.2
502	2012	24	G1077	364303	6.0
503	2012	24	G1077	364307	2.6
504	2012	24	G1077	364302	0.0
505	2013	24	G1077	364297	6.5
506	2013	24	G1077	364302	1.4
507	2013	24	G1077	364305	5.0
509	2009	25	G1042	360141	0.0
510	2009	25	G1042	360142	7.0
511	2009	25	G1042	360140	0.0
512	2009	25	G1042	360139	0.0
513	2009	25	G1042	360138	5.5
514	2009	25	G1042	360137	6.1
515	2009	25	G1042	360136	7.7
516	2009	25	G1042	360135	0.0
517	2009	25	G1042	360143	5.1
518	2010	25	G1042	360135	3.4
519	2010	25	G1042	360139	5.0
520	2010	25	G1042	360140	5.2
521	2010	25	G1042	360141	0.0
522	2010	25	G1042	360150	6.0
523	2010	25	G1042	360144	4.3
524	2010	25	G1042	360153	0.4
525	2010	25	G1042	360161	5.9
526	2010	25	G1042	360145	0.0
527	2011	25	G1042	360148	0.0
528	2011	25	G1042	360135	0.0
529	2011	25	G1042	360141	0.0
530	2011	25	G1042	360145	2.9
531	2011	25	G1042	360151	0.0
532	2011	25	G1042	360153	0.0
533	2011	25	G1042	360144	6.5
539	2011	26	G1042	360139	0.0
546	2009	27	G1042	360141	0.0
547	2009	27	G1042	360139	0.0
548	2009	27	G1042	360138	8.9
549	2009	27	G1042	360142	9.3
550	2010	28	G1042	360140	7.7
551	2010	28	G1042	360134	0.0
552	2010	28	G1042	360135	0.0
553	2010	28	G1042	360136	3.9
554	2010	28	G1042	360137	0.0
555	2010	28	G1042	360139	0.0
556	2010	28	G1042	360141	4.4
557	2010	28	G1042	360142	0.0
558	2010	28	G1042	360143	0.0
559	2010	28	G1042	360138	3.3
560	2012	29	G1077	364298	6.5
561	2012	29	G1077	364288	5.0
562	2012	29	G1077	364289	8.7
563	2012	29	G1077	364290	2.0
564	2012	29	G1077	364291	6.9
565	2012	29	G1077	364292	10.0
566	2012	29	G1077	364293	4.1
567	2012	29	G1077	364299	1.3
568	2012	29	G1077	364294	7.9
569	2012	29	G1077	364301	0.4
570	2013	29	G1077	364300	0.0
571	2013	29	G1077	364290	0.0
572	2013	29	G1077	364293	0.0
573	2013	29	G1077	364296	0.0
574	2013	29	G1077	364299	0.0
575	2013	29	G1077	364301	0.0
576	2013	29	G1077	364302	0.0
577	2013	29	G1077	364303	0.0
578	2013	29	G1077	364305	0.0
579	2013	29	G1077	364297	0.0
583	2012	30	G1042	360136	0.0
584	2012	30	G1042	360137	0.0
585	2012	30	G1042	360141	3.7
586	2012	30	G1042	360142	0.0
587	2012	30	G1042	360143	6.0
588	2012	31	G1077	364288	0.0
589	2012	31	G1077	364290	0.0
590	2012	31	G1077	364291	0.0
591	2012	31	G1077	364292	6.7
592	2012	31	G1077	364293	0.0
593	2012	31	G1077	364294	0.0
594	2012	31	G1077	364298	2.6
595	2012	31	G1077	364299	0.0
596	2012	31	G1077	364301	0.0
597	2012	31	G1077	399003	0.0
598	2012	31	G1077	364309	6.0
599	2012	31	G1077	364289	6.0
600	2009	32	G1077	364288	0.0
601	2009	32	G1042	360139	0.0
602	2009	32	G1042	360138	0.0
603	2009	32	G1042	360136	0.0
604	2009	32	G1042	360135	0.0
605	2009	32	G1042	360134	0.0
606	2009	32	G1077	364290	0.0
607	2009	32	G1077	364299	0.0
608	2009	32	G1077	364294	0.0
609	2009	32	G1077	364298	2.0
612	2011	33	G1042	360139	5.5
613	2011	33	G1042	360138	6.2
614	2011	33	G1042	360134	4.3
615	2011	33	G1042	360135	6.5
616	2011	33	G1042	360136	3.4
617	2011	33	G1042	360137	6.8
618	2012	33	G1042	360140	5.0
619	2012	33	G1042	360141	6.1
620	2012	33	G1042	360143	6.0
621	2012	33	G1042	360134	9.0
622	2013	33	G1042	360146	0.0
623	2013	33	G1042	360151	0.0
624	2013	33	G1042	360161	0.0
625	2010	34	G1042	360140	7.9
626	2010	34	G1042	360141	6.7
627	2010	34	G1042	360142	5.3
628	2010	34	G1042	360143	6.6
629	2010	34	G1042	360137	8.5
630	2010	34	G1042	360139	8.3
631	2010	34	G1042	360138	6.1
632	2010	34	G1042	360134	5.0
633	2010	34	G1042	360135	5.8
634	2010	34	G1042	360136	5.8
635	2011	34	G1042	360145	6.1
636	2011	34	G1042	360146	5.8
637	2011	34	G1042	360148	6.2
638	2011	34	G1042	360150	8.1
639	2011	34	G1042	360151	3.3
640	2011	34	G1042	360152	7.8
641	2011	34	G1042	360153	4.4
642	2011	34	G1042	360155	0.0
643	2011	34	G1042	360161	6.8
644	2011	34	G1042	360144	5.4
645	2012	34	G1042	360158	5.7
646	2012	34	G1042	360147	5.0
647	2012	34	G1042	360151	8.2
648	2012	34	G1042	360155	6.6
649	2012	34	G1042	360159	7.4
650	2012	34	G1042	360153	6.6
651	2013	34	G1042	360156	5.3
652	2013	34	G1042	360162	5.6
653	2013	34	G1042	360163	5.3
654	2013	34	G1042	360154	2.4
655	2013	34	G1042	360157	6.5
656	2013	34	G1042	360149	5.0
657	2009	35	G1042	360134	7.8
658	2009	35	G1042	360135	9.3
659	2009	35	G1042	360139	5.0
660	2009	35	G1042	360142	9.1
661	2009	35	G1042	360138	7.7
662	2010	35	G1042	360136	8.2
663	2010	35	G1042	360137	8.3
664	2010	35	G1042	360141	6.8
665	2010	35	G1042	360140	7.0
666	2011	35	G1042	360143	8.0
667	2011	35	G1042	360151	1.0
668	2011	35	G1042	360150	8.0
669	2013	35	G1042	360152	0.0
670	2013	35	G1042	360162	5.7
671	2013	35	G1042	360163	0.0
672	2011	36	G1042	360134	6.0
673	2011	36	G1042	360135	7.2
674	2011	36	G1042	360136	5.9
675	2011	36	G1042	360137	7.1
676	2011	36	G1042	360138	8.6
681	2010	37	G1077	364292	0.0
682	2010	37	G1077	364293	0.0
683	2010	37	G1077	364289	0.0
684	2010	37	G1077	364288	0.0
685	2010	37	G1077	364298	0.0
686	2010	37	G1077	364301	0.0
687	2010	37	G1077	364299	0.0
688	2010	37	G1077	364290	0.0
689	2012	38	G1042	360135	0.0
690	2012	38	G1042	360136	5.3
691	2012	38	G1042	360137	0.0
692	2013	38	G1042	360138	0.0
693	2013	38	G1042	360134	0.0
694	2013	38	G1042	360137	7.0
695	2013	38	G1042	360139	0.0
696	2013	38	G1042	360135	0.0
697	2010	39	G1042	360138	1.6
698	2010	39	G1042	360139	0.0
699	2010	39	G1042	360140	0.0
700	2010	39	G1042	360141	0.0
701	2010	39	G1042	360142	0.0
702	2010	39	G1042	360143	0.0
703	2010	40	G1042	360137	6.1
704	2010	40	G1042	360134	2.7
705	2010	40	G1042	360136	3.9
706	2010	40	G1042	360138	6.0
707	2010	40	G1042	360139	3.8
708	2010	40	G1042	360140	5.6
709	2010	40	G1042	360141	0.0
710	2010	40	G1042	360142	5.5
711	2010	40	G1042	360143	0.0
712	2010	40	G1042	360135	2.7
713	2011	40	G1042	360150	6.9
714	2011	40	G1042	360134	7.6
715	2011	40	G1042	360135	5.0
716	2011	40	G1042	360136	6.3
717	2011	40	G1042	360139	6.3
718	2011	40	G1042	360141	5.8
719	2011	40	G1042	360151	0.0
720	2011	40	G1042	360143	6.0
721	2012	40	G1042	360151	0.3
722	2012	40	G1042	360144	2.3
723	2012	40	G1042	360145	0.0
724	2012	40	G1042	360146	3.2
725	2012	40	G1042	360152	0.0
726	2012	40	G1042	360148	4.0
727	2012	40	G1042	360153	5.8
728	2012	40	G1042	360155	2.2
729	2012	40	G1042	360161	7.0
730	2013	40	G1042	360155	5.4
731	2013	40	G1042	360159	0.0
732	2013	40	G1042	360144	5.1
733	2013	40	G1042	360145	3.3
734	2013	40	G1042	360146	5.5
735	2013	40	G1042	360148	5.6
736	2013	40	G1042	360151	5.7
737	2013	40	G1042	360152	0.0
738	2011	41	G1042	360134	3.5
739	2011	41	G1042	360135	0.0
740	2011	41	G1042	360136	3.6
741	2011	41	G1042	360137	7.7
742	2011	41	G1042	360138	6.0
743	2011	41	G1042	360139	0.0
744	2011	41	G1042	360140	0.0
745	2011	41	G1042	360141	0.0
746	2011	41	G1042	360142	5.0
747	2011	41	G1042	360143	2.5
748	2012	41	G1042	360134	7.5
749	2012	41	G1042	360135	3.2
750	2012	41	G1042	360136	7.3
751	2012	41	G1042	360139	6.0
752	2012	41	G1042	360143	6.0
753	2013	41	G1042	360140	4.0
754	2013	41	G1042	360141	0.0
755	2013	41	G1042	360144	0.0
756	2013	41	G1042	360145	0.0
757	2013	41	G1042	360135	0.0
758	2011	42	G1077	364291	5.5
759	2011	42	G1077	364290	6.8
760	2011	42	G1077	364292	9.4
761	2011	42	G1077	364293	5.8
762	2011	42	G1077	364294	5.0
763	2011	42	G1077	364298	7.1
764	2011	42	G1077	364307	3.0
765	2011	42	G1077	364289	6.5
766	2012	42	G1077	364297	5.7
767	2012	42	G1077	364296	6.9
768	2012	42	G1077	364300	7.5
769	2012	42	G1077	364302	6.2
770	2012	42	G1077	364303	5.0
771	2012	42	G1077	364304	7.0
772	2012	42	G1077	364305	5.4
773	2012	42	G1077	364306	7.4
774	2012	42	G1077	364307	6.4
775	2012	42	G1077	364295	6.5
776	2013	42	G1077	364323	5.8
777	2013	42	G1077	364308	6.5
778	2013	42	G1077	364310	7.7
779	2013	42	G1077	364312	7.3
780	2013	42	G1077	364322	4.0
781	2013	42	G1077	364328	4.0
782	2013	42	G1077	364315	7.3
783	2011	42	G1077	364288	6.0
784	2011	42	G1077	364299	6.0
785	2011	42	G1077	364301	6.0
786	2011	42	G1077	364309	6.0
787	2011	42	G1077	364311	6.0
797	2010	43	G1042	360150	7.8
798	2010	43	G1042	360139	5.0
799	2010	43	G1042	360145	4.0
800	2010	43	G1042	360151	6.2
801	2009	44	G1042	360142	0.0
802	2009	44	G1042	360141	0.0
803	2009	44	G1042	360140	0.0
804	2009	44	G1042	360139	0.0
805	2009	44	G1042	360138	0.0
806	2009	44	G1042	360137	0.0
807	2009	44	G1042	360136	0.0
808	2009	44	G1042	360135	0.0
809	2009	44	G1042	360134	0.0
810	2009	44	G1042	360143	0.0
811	2009	45	G1042	360135	0.0
812	2009	45	G1042	360143	0.0
813	2009	45	G1042	360142	0.0
814	2009	45	G1042	360141	0.0
815	2009	45	G1042	360140	0.0
816	2009	45	G1042	360139	0.0
817	2009	45	G1042	360138	0.0
818	2009	45	G1042	360137	0.0
819	2009	45	G1042	360136	0.0
820	2009	45	G1042	360134	0.0
822	2009	46	G1042	360134	7.3
823	2009	46	G1042	360139	0.0
824	2009	46	G1042	360138	7.6
825	2009	46	G1042	360137	0.0
826	2009	46	G1042	360135	7.4
827	2009	46	G1042	360136	7.7
828	2010	46	G1042	360137	5.6
829	2010	46	G1042	360139	6.0
830	2010	46	G1042	360140	5.3
831	2010	46	G1042	360141	5.0
832	2010	46	G1042	360143	0.0
833	2011	46	G1042	360145	0.0
834	2011	46	G1042	360153	7.5
835	2011	46	G1042	360146	5.5
836	2011	46	G1042	360143	8.5
837	2011	46	G1042	360144	5.4
838	2012	46	G1042	360155	3.3
839	2012	46	G1042	360148	7.5
840	2012	46	G1042	360145	5.4
841	2013	46	G1042	360150	7.1
842	2013	46	G1042	360151	5.5
843	2013	46	G1042	360152	0.0
844	2013	46	G1042	360155	3.9
862	2009	47	G1077	364298	7.4
863	2009	47	G1077	364288	5.2
864	2009	47	G1077	364293	5.0
865	2009	47	G1077	364292	5.7
866	2009	47	G1077	364291	5.3
867	2009	47	G1077	364299	0.0
868	2009	47	G1077	364301	5.0
869	2009	47	G1077	364290	7.1
870	2010	47	G1077	364299	6.6
871	2010	47	G1077	364302	3.3
872	2010	47	G1077	364300	5.1
873	2010	47	G1077	364303	1.8
874	2010	47	G1077	364297	6.1
875	2010	47	G1077	364305	5.0
876	2010	47	G1077	364295	3.5
877	2010	47	G1077	364296	7.2
878	2010	47	G1077	360022	6.3
879	2010	47	G1077	364307	0.0
880	2011	47	G1077	364295	3.6
881	2011	47	G1077	364302	6.4
882	2011	47	G1077	364303	5.0
883	2011	47	G1077	364304	8.0
884	2011	47	G1077	364307	5.0
885	2011	47	G1077	364309	7.5
886	2011	47	G1077	364311	5.3
887	2011	47	G1077	364314	5.0
888	2011	47	G1077	364322	5.0
889	2011	47	G1077	364328	0.0
890	2012	47	G1077	364308	5.9
891	2012	47	G1077	364310	5.0
892	2012	47	G1077	364312	0.0
893	2012	47	G1077	364313	5.9
894	2012	47	G1077	364315	6.7
895	2012	47	G1077	364316	6.9
896	2012	47	G1077	364323	5.3
897	2012	47	G1077	364328	0.0
898	2012	47	G1077	364324	6.1
899	2012	47	G1077	364295	5.9
900	2013	47	G1077	364312	5.6
901	2013	47	G1077	364317	4.0
902	2013	47	G1077	364325	9.0
903	2013	47	G1077	364320	5.3
904	2013	47	G1077	364326	6.0
905	2013	47	G1077	364328	5.0
906	2013	47	G1077	364321	7.1
911	2009	48	G1042	360142	5.5
912	2009	48	G1042	360141	4.1
913	2009	48	G1042	360140	5.8
914	2009	48	G1042	360139	0.0
915	2009	48	G1042	360138	7.0
916	2009	48	G1042	360137	5.6
917	2009	48	G1042	360135	0.0
918	2010	48	G1042	360139	4.2
919	2010	48	G1042	360135	2.6
920	2010	48	G1042	360141	5.5
921	2010	48	G1042	360144	1.5
922	2010	48	G1042	360145	1.6
923	2010	48	G1042	360150	8.1
924	2010	48	G1042	360161	6.5
925	2011	48	G1042	360144	2.1
926	2011	48	G1042	360135	0.0
927	2011	48	G1042	360145	0.0
928	2011	48	G1042	360148	0.0
929	2011	48	G1042	360151	0.0
930	2011	48	G1042	360153	0.0
931	2011	48	G1042	360139	6.0
943	2010	49	G1042	360161	6.4
944	2010	49	G1042	360145	5.2
945	2010	49	G1042	360146	8.5
946	2010	49	G1042	360148	4.5
947	2010	49	G1042	360150	7.7
948	2010	49	G1042	360151	5.8
949	2010	49	G1042	360152	7.0
950	2010	49	G1042	360153	6.2
951	2010	49	G1042	360155	7.0
952	2011	49	G1042	364211	6.0
953	2011	49	G1042	360147	4.2
954	2011	49	G1042	360148	7.8
955	2011	49	G1042	360154	0.0
956	2011	49	G1042	360156	5.1
957	2011	49	G1042	360157	2.0
958	2011	49	G1042	360158	5.4
959	2011	49	G1042	360160	5.2
960	2011	49	G1042	364212	5.3
961	2011	49	G1042	360159	5.4
962	2012	49	G1042	360147	6.2
963	2012	49	G1042	360149	2.3
964	2012	49	G1042	360154	5.0
965	2012	49	G1042	360157	5.3
966	2012	49	G1042	361230	6.5
967	2012	49	G1042	361232	6.6
968	2012	49	G1042	361233	8.4
969	2012	49	G1042	361234	0.0
970	2012	49	G1042	364347	5.2
971	2013	49	G1042	360149	5.0
972	2013	49	G1042	361253	8.0
973	2013	49	G1042	360162	6.7
974	2013	49	G1042	360163	6.7
975	2010	50	G1042	360134	0.0
976	2010	50	G1042	360138	0.0
977	2010	50	G1042	360139	0.0
978	2010	50	G1042	360142	0.0
979	2010	50	G1042	360135	0.0
994	2010	51	G1077	364298	7.8
995	2010	51	G1077	364291	7.0
996	2010	51	G1077	364292	7.8
997	2010	51	G1077	364293	7.1
998	2010	51	G1077	364294	9.0
999	2010	51	G1077	364290	7.0
1000	2010	51	G1077	364289	8.2
1001	2011	51	G1077	364302	8.5
1002	2011	51	G1077	364305	8.4
1003	2011	51	G1077	364306	7.0
1004	2011	51	G1077	364307	6.4
1005	2011	51	G1077	364300	5.9
1006	2011	51	G1077	364295	6.3
1007	2011	51	G1077	364296	7.5
1008	2011	51	G1077	364297	7.4
1009	2012	51	G1077	364312	6.8
1010	2012	51	G1077	364308	8.2
1011	2012	51	G1077	364314	6.5
1012	2012	51	G1077	364315	7.0
1013	2012	51	G1077	364322	7.5
1014	2012	51	G1077	364323	7.0
1015	2012	51	G1077	364328	7.0
1016	2012	51	G1077	364310	8.1
1017	2013	51	G1077	364313	7.0
1018	2013	51	G1077	364316	7.6
1019	2013	51	G1077	364317	8.2
1020	2013	51	G1077	364321	9.0
1021	2013	51	G1077	364326	9.0
1022	2013	51	G1077	364327	7.8
1023	2013	51	G1077	364329	8.5
1024	2013	51	G1077	364309	6.8
1025	2010	51	G1077	364288	6.0
1026	2010	51	G1077	364301	6.0
1027	2010	51	G1077	364299	6.0
1028	2010	51	G1077	364303	6.0
1029	2010	51	G1077	364304	6.0
1030	2013	51	G1077	364311	0.0
1035	2010	52	G1042	360142	6.1
1036	2010	52	G1077	364299	0.0
1037	2010	52	G1042	360135	0.0
1038	2010	52	G1042	360137	4.5
1039	2010	52	G1042	360139	0.0
1040	2010	52	G1077	364288	0.0
1041	2010	52	G1042	360151	0.1
1042	2010	52	G1042	360161	1.6
1043	2010	52	G1042	360138	8.1
1044	2010	52	G1077	364298	0.0
1045	2013	52	G1042	360141	0.0
1046	2013	52	G1042	360144	0.0
1047	2013	52	G1042	360148	0.0
1048	2013	52	G1042	360150	0.0
1049	2013	52	G1042	360151	0.0
1050	2013	52	G1042	360152	0.3
1051	2013	52	G1042	360139	5.7
1052	2013	52	G1042	360135	4.2
1053	2013	52	G1042	360140	4.0
1069	2009	53	G1077	364290	6.2
1070	2009	53	G1077	364299	0.0
1071	2009	53	G1077	364301	4.0
1072	2009	53	G1077	364298	5.6
1073	2009	53	G1077	364293	0.0
1074	2009	53	G1077	364292	8.1
1075	2010	53	G1077	364305	0.0
1076	2010	53	G1077	364293	8.4
1077	2010	53	G1077	364301	7.4
1078	2010	53	G1077	364299	7.1
1079	2010	53	G1077	364300	0.0
1080	2010	53	G1077	364297	7.4
1081	2011	53	G1077	364295	9.2
1082	2011	53	G1077	364300	7.0
1083	2011	53	G1077	364304	9.0
1084	2011	53	G1077	364305	6.0
1085	2012	53	G1077	364307	5.7
1086	2012	53	G1077	364296	6.8
1087	2012	53	G1077	364302	8.1
1088	2012	53	G1077	364306	8.0
1089	2012	53	G1077	364303	8.0
1090	2013	53	G1077	364311	7.3
1091	2013	53	G1077	364309	7.2
1092	2013	53	G1077	364312	7.0
1093	2013	53	G1077	364314	7.6
1094	2013	53	G1077	364308	8.7
1095	2011	54	G1077	364293	3.4
1096	2011	54	G1077	364298	5.5
1097	2011	54	G1077	364292	5.3
1098	2011	54	G1077	364294	7.5
1099	2011	54	G1077	364289	3.0
1100	2011	54	G1077	364290	2.0
1101	2011	54	G1077	364291	3.6
1102	2012	54	G1077	364289	0.0
1103	2012	54	G1077	364291	0.0
1104	2012	54	G1077	364300	0.0
1105	2012	54	G1077	364303	0.0
1106	2012	54	G1077	364305	0.0
1107	2011	54	G1077	364299	6.0
1108	2011	54	G1077	364301	6.0
1109	2011	54	G1077	364309	6.0
1110	2011	54	G1077	364311	6.0
1111	2011	54	G1077	364288	6.0
1114	2011	55	G1077	364298	6.6
1115	2011	55	G1077	364290	7.2
1116	2011	55	G1077	364291	6.0
1117	2011	55	G1077	364292	8.3
1118	2011	55	G1077	364305	6.0
1119	2011	55	G1077	364306	5.9
1120	2011	55	G1077	364293	7.5
1121	2012	55	G1077	364304	7.0
1122	2012	55	G1077	364307	7.0
1123	2012	55	G1077	364300	8.0
1124	2012	55	G1077	364303	5.0
1125	2012	55	G1077	364302	6.7
1126	2012	55	G1077	364295	7.2
1127	2012	55	G1077	364296	6.8
1128	2012	55	G1077	364297	7.6
1129	2013	55	G1077	364308	6.4
1130	2013	55	G1077	364310	8.6
1131	2013	55	G1077	364312	7.0
1132	2013	55	G1077	364314	6.4
1133	2013	55	G1077	364315	6.2
1134	2013	55	G1077	364322	6.0
1135	2013	55	G1077	364323	6.3
1136	2013	55	G1077	364328	4.3
1137	2011	55	G1077	364288	0.0
1138	2011	55	G1077	364299	0.0
1139	2011	55	G1077	364301	0.0
1140	2011	55	G1077	364309	0.0
1141	2011	55	G1077	364311	0.0
1144	2012	56	G1077	364307	4.1
1145	2012	56	G1077	364290	6.7
1146	2012	56	G1077	364291	7.9
1147	2012	56	G1077	364292	8.1
1148	2012	56	G1077	364293	7.4
1149	2012	56	G1077	364298	6.6
1150	2013	56	G1077	364305	6.0
1151	2013	56	G1077	364295	6.4
1152	2013	56	G1077	364296	6.7
1153	2013	56	G1077	364297	7.8
1154	2013	56	G1077	364300	6.3
1155	2013	56	G1077	364302	6.9
1156	2013	56	G1077	364304	8.0
1157	2013	56	G1077	364306	6.5
1158	2013	56	G1077	364307	7.5
1159	2013	56	G1077	364303	6.6
1160	2012	56	G1077	364288	6.0
1161	2012	56	G1077	364301	6.0
1162	2012	56	G1077	364309	6.0
1163	2012	56	G1077	364311	6.0
1164	2012	56	G1077	364299	6.0
1165	2013	57	G1077	364300	0.0
1166	2013	57	G1077	364304	7.5
1167	2013	57	G1077	364306	0.0
1168	2013	57	G1077	364307	0.0
1169	2013	57	G1077	364298	6.1
1170	2013	57	G1077	364290	2.3
1171	2013	57	G1077	364291	3.4
1172	2013	57	G1077	364292	7.5
1173	2013	57	G1077	364293	6.1
1174	2013	57	G1077	364301	0.0
1175	2013	57	G1077	364309	0.0
1176	2013	57	G1077	364294	5.7
1177	2013	57	G1077	364311	0.0
1178	2013	57	G1077	364299	0.0
1179	2013	57	G1077	364288	5.1
1180	2013	57	G1077	364289	5.2
1181	2011	58	G1077	364293	6.3
1182	2011	58	G1077	364298	6.4
1183	2011	58	G1077	364294	7.3
1184	2011	58	G1077	364289	6.2
1185	2011	58	G1077	364290	7.3
1186	2011	58	G1077	364291	6.0
1187	2011	58	G1077	364292	9.2
1188	2012	58	G1077	364305	8.0
1189	2012	58	G1077	364307	5.3
1190	2012	58	G1077	364295	7.9
1191	2012	58	G1077	364296	7.3
1192	2012	58	G1077	364297	6.4
1193	2012	58	G1077	364300	7.0
1194	2012	58	G1077	364302	5.6
1195	2012	58	G1077	364306	8.0
1196	2013	58	G1077	364310	6.8
1197	2013	58	G1077	364308	7.6
1198	2013	58	G1077	364312	6.3
1199	2013	58	G1077	364314	6.0
1200	2013	58	G1077	364315	7.0
1201	2013	58	G1077	364322	6.6
1202	2013	58	G1077	364323	6.3
1203	2013	58	G1077	364328	6.0
1204	2011	58	G1077	364299	6.0
1205	2011	58	G1077	364301	6.0
1206	2011	58	G1077	364303	6.0
1207	2011	58	G1077	364304	6.0
1208	2011	58	G1077	364309	6.0
1209	2011	58	G1077	364311	6.0
1210	2011	58	G1077	364288	6.0
1211	2012	59	G1077	364288	0.0
1212	2012	59	G1077	364289	0.0
1213	2012	59	G1077	364290	0.0
1214	2012	59	G1077	364291	0.0
1215	2012	59	G1077	364292	0.0
1216	2012	59	G1077	364293	0.0
1217	2012	59	G1077	364294	0.0
1218	2012	59	G1077	364298	0.0
1219	2012	59	G1077	364299	0.0
1220	2013	59	G1077	364290	0.0
1221	2013	59	G1077	364288	5.2
1222	2013	59	G1077	364291	6.0
1223	2013	59	G1077	364289	0.0
1224	2013	59	G1077	364292	5.0
1225	2013	59	G1077	364293	5.8
1226	2013	59	G1077	364294	7.2
1227	2013	59	G1077	364298	5.0
1228	2013	59	G1077	364299	7.1
1229	2013	59	G1077	364301	1.9
1230	2012	60	G1077	364288	0.0
1231	2012	60	G1077	364290	0.0
1232	2012	60	G1077	364291	0.0
1233	2012	60	G1077	364292	6.7
1234	2012	60	G1077	364293	0.0
1235	2012	60	G1077	364294	0.0
1236	2012	60	G1077	364298	2.2
1237	2012	60	G1077	364299	0.0
1238	2012	60	G1077	364301	0.0
1239	2012	60	G1077	399003	0.0
1240	2012	60	G1077	364309	6.0
1241	2012	60	G1077	364289	0.0
1242	2012	61	G1077	364289	7.4
1243	2012	61	G1077	364290	6.5
1244	2012	61	G1077	364291	2.5
1245	2012	61	G1077	364292	6.4
1246	2012	61	G1077	364293	2.5
1247	2012	61	G1077	364294	2.8
1248	2012	61	G1077	364298	5.7
1249	2012	61	G1077	364301	2.3
1250	2012	61	G1077	364299	3.1
1251	2012	61	G1077	364288	2.7
1252	2009	62	G1042	360136	6.8
1253	2009	62	G1042	360139	0.0
1254	2009	62	G1042	360138	5.6
1255	2009	62	G1042	360134	0.0
1256	2009	62	G1042	360137	6.1
1257	2009	63	G1077	364301	0.0
1258	2009	63	G1077	364290	0.0
1259	2009	63	G1077	364294	0.0
1260	2009	63	G1077	364298	0.0
1261	2009	63	G1077	364288	0.0
1262	2009	63	G1077	364289	0.0
1263	2009	63	G1077	364293	0.0
1264	2009	63	G1077	364292	0.0
1265	2009	63	G1077	364291	0.0
1266	2009	63	G1077	364299	0.0
1278	2009	64	G1077	364294	6.0
1279	2009	64	G1077	364301	0.0
1280	2009	64	G1077	364298	6.6
1281	2009	64	G1077	364288	1.5
1282	2009	64	G1077	364293	5.4
1283	2009	64	G1077	364292	7.5
1284	2009	64	G1077	364299	0.0
1285	2009	64	G1077	364290	8.5
1286	2010	64	G1077	364288	4.0
1287	2010	64	G1077	364301	0.0
1288	2010	64	G1077	364299	0.0
1289	2010	64	G1077	364302	4.1
1290	2010	64	G1077	364300	4.0
1291	2010	64	G1077	364297	8.2
1292	2010	64	G1077	364305	4.2
1293	2010	64	G1077	364295	0.0
1294	2010	64	G1077	360022	0.0
1295	2010	64	G1077	364296	6.4
1316	2009	65	G1077	364291	6.3
1317	2009	65	G1077	364290	7.9
1318	2009	65	G1077	364299	8.0
1319	2009	65	G1077	364294	5.1
1320	2009	65	G1077	364301	8.0
1321	2009	65	G1077	364298	6.7
1322	2009	65	G1077	364288	5.6
1323	2009	65	G1077	364289	7.0
1324	2009	65	G1077	364293	7.7
1325	2009	65	G1077	364292	6.0
1326	2010	65	G1077	364304	9.5
1327	2010	65	G1077	364302	6.4
1328	2010	65	G1077	364307	6.6
1329	2010	65	G1077	360022	7.5
1330	2010	65	G1077	364300	7.5
1331	2010	65	G1077	364303	7.7
1332	2010	65	G1077	364297	7.9
1333	2010	65	G1077	364305	7.0
1334	2010	65	G1077	364295	5.7
1335	2010	65	G1077	364296	9.3
1336	2011	65	G1077	364314	9.0
1337	2011	65	G1077	364308	8.5
1338	2011	65	G1077	364309	7.8
1339	2011	65	G1077	364310	7.0
1340	2011	65	G1077	364312	7.8
1341	2011	65	G1077	364315	8.1
1342	2011	65	G1077	364322	9.0
1343	2011	65	G1077	364323	6.3
1344	2011	65	G1077	364328	7.2
1345	2011	65	G1077	364311	6.7
1346	2012	65	G1077	364313	8.6
1347	2012	65	G1077	364316	8.3
1348	2012	65	G1077	364317	9.5
1349	2012	65	G1077	364320	9.0
1350	2012	65	G1077	364321	10.0
1351	2012	65	G1077	364326	9.0
1352	2012	65	G1077	364327	8.0
1353	2012	65	G1077	364329	8.1
1354	2009	66	G1042	360134	3.7
1355	2009	66	G1042	360143	5.0
1356	2009	66	G1042	360142	5.6
1357	2009	66	G1042	360141	0.0
1358	2009	66	G1042	360140	2.8
1359	2009	66	G1042	360139	0.0
1360	2009	66	G1042	360138	5.4
1361	2009	66	G1042	360137	6.5
1362	2009	66	G1042	360135	3.4
1363	2009	66	G1042	360136	6.1
1364	2010	66	G1042	360134	6.1
1365	2010	66	G1042	360140	6.0
1366	2010	66	G1042	360144	5.5
1367	2010	66	G1042	360151	1.4
1368	2011	66	G1042	360135	6.3
1369	2011	66	G1042	360139	6.6
1370	2011	66	G1042	360141	6.9
1371	2012	66	G1042	360146	5.3
1372	2012	66	G1042	360148	7.0
1373	2012	66	G1042	360145	6.9
1374	2012	66	G1042	360150	9.0
1375	2012	66	G1042	360151	5.3
1376	2012	66	G1042	360152	5.0
1377	2012	66	G1042	360153	7.5
1378	2012	66	G1042	360161	7.8
1379	2013	66	G1042	360159	7.2
1380	2013	66	G1042	360147	5.3
1381	2013	66	G1042	360158	6.1
1382	2013	66	G1042	360162	5.2
1383	2013	66	G1042	360163	6.0
1384	2013	66	G1042	361843	7.3
1385	2013	66	G1042	361846	7.5
1386	2013	66	G1042	361850	7.5
1387	2013	66	G1042	360155	5.0
1388	2009	67	G1042	360137	0.0
1389	2009	67	G1042	360143	0.0
1390	2009	67	G1042	360142	7.0
1391	2009	67	G1042	360141	0.0
1392	2009	67	G1042	360140	7.0
1393	2009	67	G1042	360139	0.0
1394	2009	67	G1042	360136	7.6
1395	2009	67	G1042	360138	5.3
1396	2009	67	G1042	360135	0.0
1397	2009	67	G1042	360134	0.0
1398	2009	68	G1042	360137	5.3
1399	2009	68	G1042	360143	6.3
1400	2009	68	G1042	360142	6.5
1401	2009	68	G1042	360141	5.8
1402	2009	68	G1042	360140	6.6
1403	2009	68	G1042	360138	5.9
1404	2009	68	G1042	360136	5.5
1405	2009	68	G1042	360135	5.6
1406	2009	68	G1042	360134	4.7
1407	2009	68	G1042	360139	6.0
1408	2010	68	G1042	360148	0.0
1409	2010	68	G1042	360134	6.1
1410	2010	68	G1042	360144	3.9
1411	2010	68	G1042	360146	2.6
1412	2010	68	G1042	360150	6.8
1413	2010	68	G1042	360151	2.9
1414	2010	68	G1042	360152	3.0
1415	2010	68	G1042	360153	6.1
1416	2010	68	G1042	360155	0.0
1417	2010	68	G1042	360161	7.0
1418	2010	68	G1042	360145	5.4
1419	2011	68	G1042	364208	5.7
1420	2011	68	G1042	360160	6.0
1421	2011	68	G1042	360155	5.0
1422	2011	68	G1042	360162	4.8
1423	2011	68	G1042	360144	5.2
1424	2011	68	G1042	360146	3.8
1425	2011	68	G1042	360148	5.8
1426	2011	68	G1042	360151	3.2
1427	2011	68	G1042	360152	6.0
1428	2012	68	G1042	360162	6.3
1429	2012	68	G1042	360146	5.3
1430	2012	68	G1042	360151	6.8
1431	2012	68	G1042	360154	0.0
1432	2012	68	G1042	360159	7.0
1433	2012	68	G1042	360163	4.4
1434	2012	68	G1042	364347	5.1
1435	2012	68	G1042	360158	5.8
1436	2013	68	G1042	364301	6.0
1437	2013	68	G1042	360157	6.2
1438	2013	68	G1042	360156	6.6
1439	2013	68	G1042	360163	5.0
1440	2013	68	G1042	360147	5.0
1441	2013	68	G1042	360149	3.5
1442	2013	68	G1042	360154	3.9
1443	2009	69	G1042	360138	5.2
1444	2009	69	G1042	360137	6.1
1445	2009	69	G1042	360136	6.1
1446	2009	69	G1042	360135	0.0
1447	2009	69	G1042	360134	4.7
1448	2009	69	G1042	360141	0.0
1449	2009	69	G1042	360139	0.0
1450	2009	69	G1042	360140	7.0
1451	2009	69	G1042	360143	0.0
1452	2009	69	G1042	360142	6.5
1453	2010	69	G1042	360141	5.5
1454	2010	69	G1042	360143	6.0
1455	2010	69	G1042	360144	1.0
1456	2010	69	G1042	360150	8.0
1457	2010	69	G1042	360134	5.2
1458	2010	69	G1042	360139	6.0
1459	2010	69	G1042	360135	5.0
1460	2011	69	G1042	360144	5.6
1461	2011	69	G1042	360145	2.9
1462	2011	69	G1042	360146	4.5
1463	2011	69	G1042	360148	0.0
1464	2011	69	G1042	360151	1.3
1465	2011	69	G1042	360152	0.0
1466	2011	69	G1042	360153	4.4
1467	2011	69	G1042	360155	0.0
1468	2011	69	G1042	360161	7.0
1469	2012	69	G1042	360155	0.0
1470	2012	69	G1042	360145	6.4
1471	2012	69	G1042	360146	6.5
1472	2012	69	G1042	360148	6.0
1473	2012	69	G1042	360151	5.7
1474	2012	69	G1042	360152	6.0
1475	2012	69	G1042	360153	6.0
1476	2013	69	G1042	361850	6.4
1477	2013	69	G1042	360155	5.0
1478	2013	69	G1042	360162	5.7
1479	2013	69	G1042	361842	5.8
1480	2013	69	G1042	361843	5.2
1481	2013	69	G1042	361844	7.2
1482	2013	69	G1042	361849	5.0
1483	2013	69	G1042	361846	6.5
1502	2009	70	G1077	364299	2.4
1503	2009	70	G1077	364301	6.2
1504	2009	70	G1077	364298	6.0
1505	2009	70	G1077	364288	4.0
1506	2009	70	G1077	364293	7.1
1507	2009	70	G1077	364292	8.4
1508	2009	70	G1077	364291	7.7
1509	2009	70	G1077	364290	6.1
1510	2010	70	G1077	364297	7.2
1511	2010	70	G1077	364288	7.0
1512	2010	70	G1077	364299	5.7
1513	2010	70	G1077	364302	2.3
1514	2010	70	G1077	364303	5.7
1515	2010	70	G1077	364305	2.7
1516	2010	70	G1077	364295	0.0
1517	2010	70	G1077	364296	7.6
1518	2010	70	G1077	364304	7.0
1519	2010	70	G1077	360022	6.0
1520	2010	70	G1077	364307	0.0
1521	2010	70	G1077	364300	5.0
1522	2011	70	G1077	364307	5.1
1523	2011	70	G1077	364310	5.5
1524	2011	70	G1077	364314	6.5
1525	2011	70	G1077	364315	6.0
1526	2011	70	G1077	364322	1.0
1527	2011	70	G1077	364323	5.0
1528	2011	70	G1077	364328	0.0
1529	2011	70	G1077	364305	6.0
1530	2011	70	G1077	364295	7.2
1531	2011	70	G1077	364302	6.2
1532	2012	70	G1077	364311	5.8
1533	2012	70	G1077	364312	0.0
1534	2012	70	G1077	364313	7.4
1535	2012	70	G1077	364316	5.8
1536	2012	70	G1077	364322	7.3
1537	2012	70	G1077	364326	0.0
1538	2012	70	G1077	364328	0.0
1539	2012	70	G1077	364308	6.7
1540	2012	70	G1077	364309	7.5
1541	2013	70	G1077	364312	6.0
1542	2013	70	G1077	364320	6.7
1543	2013	70	G1077	364321	5.0
1544	2013	70	G1077	364324	6.9
1545	2013	70	G1077	364325	6.2
1546	2013	70	G1077	364326	5.0
1547	2013	70	G1077	364328	5.5
1568	2009	71	G1077	364299	8.3
1569	2009	71	G1077	364294	6.7
1570	2009	71	G1077	364301	9.0
1571	2009	71	G1077	364298	6.7
1572	2009	71	G1077	364288	6.5
1573	2009	71	G1077	364289	8.0
1574	2009	71	G1077	364293	7.7
1575	2009	71	G1077	364292	8.6
1576	2009	71	G1077	364291	6.0
1577	2009	71	G1077	364290	7.4
1578	2010	71	G1077	364297	8.0
1579	2010	71	G1077	364305	7.0
1580	2010	71	G1077	364295	7.0
1581	2010	71	G1077	364296	7.6
1582	2010	71	G1077	364304	8.5
1583	2010	71	G1077	360022	7.5
1584	2010	71	G1077	364302	6.5
1585	2010	71	G1077	364307	5.0
1586	2010	71	G1077	364303	7.8
1587	2010	71	G1077	364300	7.5
1588	2011	71	G1077	364308	8.3
1589	2011	71	G1077	364309	7.6
1590	2011	71	G1077	364310	8.0
1591	2011	71	G1077	364311	6.0
1592	2011	71	G1077	364312	8.0
1593	2011	71	G1077	364314	7.0
1594	2011	71	G1077	364315	6.4
1595	2011	71	G1077	364322	7.7
1596	2011	71	G1077	364323	5.5
1597	2011	71	G1077	364328	5.7
1598	2012	71	G1077	364317	8.7
1599	2012	71	G1077	364316	8.3
1600	2012	71	G1077	364319	8.0
1601	2012	71	G1077	364321	8.0
1602	2012	71	G1077	364324	8.3
1603	2012	71	G1077	364325	7.9
1604	2012	71	G1077	364326	9.0
1605	2012	71	G1077	364313	8.2
1626	2009	72	G1077	364290	6.1
1627	2009	72	G1077	364299	7.2
1628	2009	72	G1077	364294	6.5
1629	2009	72	G1077	364301	6.0
1630	2009	72	G1077	364298	6.6
1631	2009	72	G1077	364288	6.5
1632	2009	72	G1077	364289	7.2
1633	2009	72	G1077	364293	6.7
1634	2009	72	G1077	364292	7.7
1635	2009	72	G1077	364291	10.0
1636	2010	72	G1077	364300	7.0
1637	2010	72	G1077	364307	5.1
1638	2010	72	G1077	364302	5.1
1639	2010	72	G1077	364303	7.2
1640	2010	72	G1077	364297	10.0
1641	2010	72	G1077	364305	5.9
1642	2010	72	G1077	364295	7.0
1643	2010	72	G1077	364296	8.6
1644	2010	72	G1077	364304	8.0
1645	2010	72	G1077	360022	7.0
1646	2011	72	G1077	364328	6.5
1647	2011	72	G1077	364308	6.9
1648	2011	72	G1077	364309	6.8
1649	2011	72	G1077	364310	7.7
1650	2011	72	G1077	364311	6.9
1651	2011	72	G1077	364312	6.8
1652	2011	72	G1077	364314	7.0
1653	2011	72	G1077	364315	7.4
1654	2011	72	G1077	364323	6.3
1655	2011	72	G1077	364322	8.5
1656	2012	72	G1077	364325	7.9
1657	2012	72	G1077	364326	9.0
1658	2012	72	G1077	364327	8.0
1659	2012	72	G1077	364317	8.9
1660	2012	72	G1077	364324	8.2
1661	2012	72	G1077	364313	9.1
1662	2012	72	G1077	364316	8.7
1663	2012	72	G1077	364319	7.9
1664	2009	73	G1042	360134	0.0
1665	2009	73	G1042	360143	0.0
1666	2009	73	G1042	360142	5.0
1667	2009	73	G1042	360141	0.0
1668	2009	73	G1042	360140	3.5
1669	2009	73	G1042	360139	0.0
1670	2009	73	G1042	360138	2.6
1671	2009	73	G1042	360137	0.0
1672	2009	73	G1042	360135	0.0
1673	2009	73	G1042	360136	3.8
1676	2009	74	G1042	360134	5.0
1677	2009	74	G1042	360136	9.5
1678	2009	74	G1042	360137	9.0
1679	2009	74	G1042	360135	8.3
1680	2009	74	G1042	360143	0.0
1681	2009	74	G1042	360142	9.0
1682	2009	74	G1042	360141	9.1
1683	2009	74	G1042	360140	8.3
1684	2009	74	G1042	360139	7.0
1685	2009	74	G1042	360138	7.7
1686	2010	74	G1042	360143	0.0
1687	2010	74	G1042	360144	9.0
1688	2010	74	G1042	360145	8.6
1689	2010	74	G1042	360146	7.0
1690	2010	74	G1042	360148	7.5
1691	2010	74	G1042	360150	9.1
1692	2010	74	G1042	360151	8.7
1693	2010	74	G1042	360153	9.0
1694	2010	74	G1042	360161	8.1
1695	2010	74	G1042	360155	8.0
1696	2011	74	G1042	360143	8.5
1697	2011	74	G1042	360147	7.5
1698	2011	74	G1042	360149	7.0
1699	2011	74	G1042	360152	10.0
1700	2011	74	G1042	360154	0.0
1701	2011	74	G1042	360156	0.0
1702	2011	74	G1042	360158	9.7
1703	2011	74	G1042	360159	8.8
1704	2011	74	G1042	360162	9.0
1705	2012	74	G1042	364212	0.0
1706	2012	74	G1042	360154	9.4
1707	2012	74	G1042	360156	8.3
1708	2012	74	G1042	360157	2.9
1709	2012	74	G1042	360160	6.5
1710	2012	74	G1042	360163	8.4
1711	2012	74	G1042	364211	9.5
1712	2012	74	G1042	364341	7.5
1713	2012	74	G1042	364342	10.0
1714	2012	74	G1042	364204	9.9
1715	2013	74	G1042	364208	9.8
1716	2013	74	G1042	360157	9.0
1717	2013	74	G1042	364203	7.3
1718	2013	74	G1042	363031	10.0
1719	2009	75	G1042	360137	0.0
1720	2009	75	G1042	360143	0.0
1721	2009	75	G1042	360142	0.0
1722	2009	75	G1042	360141	0.0
1723	2009	75	G1042	360140	0.0
1724	2009	75	G1042	360138	0.6
1725	2009	75	G1042	360136	0.0
1726	2009	75	G1042	360135	0.0
1727	2009	75	G1042	360134	0.0
1728	2009	75	G1042	360139	0.0
1736	2009	76	G1042	360137	9.2
1737	2009	76	G1042	360135	8.1
1738	2009	76	G1042	360139	7.4
1739	2010	76	G1042	360144	9.0
1740	2010	76	G1042	360145	8.5
1741	2010	76	G1042	360155	9.0
1742	2011	76	G1042	360148	7.5
1743	2011	76	G1042	360153	9.0
1744	2011	76	G1042	360161	8.0
1745	2012	76	G1042	360149	6.8
1746	2012	76	G1042	360151	3.9
1747	2012	76	G1042	360157	0.0
1750	2009	77	G1077	364301	0.0
1751	2009	77	G1077	364290	4.1
1752	2009	77	G1077	364294	6.0
1753	2009	77	G1077	364298	4.7
1754	2009	77	G1077	364288	0.0
1755	2009	77	G1077	364289	1.1
1756	2009	77	G1077	364293	1.1
1757	2009	77	G1077	364292	7.1
1758	2009	77	G1077	364291	3.5
1759	2009	77	G1077	364299	0.0
1760	2010	77	G1077	364290	0.0
1761	2010	77	G1077	364298	2.3
1762	2010	77	G1077	364299	0.0
1763	2010	77	G1077	364301	0.0
1764	2010	77	G1077	364291	3.5
1765	2010	77	G1077	364293	0.0
1766	2010	77	G1077	364289	4.0
1767	2010	77	G1077	364288	2.0
1768	2009	78	G1042	360141	6.3
1769	2009	78	G1042	360140	7.3
1770	2009	78	G1042	360139	8.0
1771	2009	78	G1042	360138	7.9
1772	2009	78	G1042	360137	8.1
1773	2009	78	G1042	360136	9.3
1774	2009	78	G1042	360135	8.7
1775	2009	78	G1042	360134	8.1
1776	2009	78	G1042	360142	9.0
1777	2009	78	G1042	360143	7.0
1778	2010	78	G1042	360153	8.1
1779	2010	78	G1042	360144	7.0
1780	2010	78	G1042	360145	7.9
1781	2010	78	G1042	360146	6.1
1782	2010	78	G1042	360148	7.5
1783	2010	78	G1042	360150	9.0
1784	2010	78	G1042	360152	5.0
1785	2010	78	G1042	360155	9.0
1786	2010	78	G1042	360161	7.8
1787	2010	78	G1042	360151	8.6
1788	2011	78	G1042	360149	7.3
1789	2011	78	G1042	360154	6.0
1790	2011	78	G1042	360156	8.0
1791	2011	78	G1042	360157	8.2
1792	2011	78	G1042	360158	8.3
1793	2011	78	G1042	360159	7.5
1794	2011	78	G1042	360160	9.0
1795	2011	78	G1042	360162	6.8
1796	2011	78	G1042	360163	7.1
1797	2011	78	G1042	360147	7.5
1798	2012	78	G1042	399104	9.3
1799	2012	78	G1042	399105	9.8
1800	2012	78	G1042	399102	9.6
1801	2012	78	G1042	399101	9.2
1802	2012	78	G1042	399103	9.9
1803	2012	78	G1042	363031	9.5
1804	2012	78	G1042	364210	8.0
1805	2012	78	G1042	364347	7.4
1837	2009	79	G1042	360134	7.3
1838	2009	79	G1042	360143	7.0
1839	2009	79	G1042	360142	9.0
1840	2009	79	G1042	360141	6.5
1841	2009	79	G1042	360140	7.3
1842	2009	79	G1042	360139	6.0
1843	2009	79	G1042	360138	9.6
1844	2009	79	G1042	360137	7.2
1845	2009	79	G1042	360136	7.7
1846	2009	79	G1042	360135	7.9
1847	2010	79	G1042	360161	6.6
1848	2010	79	G1077	364299	7.7
1849	2010	79	G1077	364290	6.5
1850	2010	79	G1077	364313	6.3
1851	2010	79	G1042	360144	5.6
1852	2010	79	G1042	360146	5.7
1853	2010	79	G1042	360155	6.6
1854	2010	79	G1042	360151	6.3
1855	2010	79	G1077	364301	7.4
1856	2010	79	G1077	364289	9.8
1857	2010	79	G1077	364298	6.7
1858	2011	79	G1077	364304	9.0
1859	2011	79	G1077	364306	7.1
1860	2011	79	G1077	364307	5.7
1861	2011	79	G1077	364303	7.9
1862	2011	79	G1077	364305	8.8
1863	2011	79	G1042	360145	7.0
1864	2011	79	G1042	360152	6.8
1865	2011	79	G1077	364296	7.5
1866	2011	79	G1077	364297	8.1
1867	2011	79	G1077	364300	9.0
1868	2011	79	G1042	360148	7.6
1869	2012	79	G1077	364311	7.0
1870	2012	79	G1042	360149	5.0
1871	2012	79	G1042	360153	6.6
1872	2012	79	G1042	360158	7.0
1873	2012	79	G1042	360159	5.0
1874	2012	79	G1042	360162	5.7
1875	2012	79	G1077	364308	6.5
1876	2012	79	G1077	364314	7.8
1877	2012	79	G1077	364316	7.1
1878	2012	79	G1077	364323	5.6
1879	2012	79	G1042	360163	6.3
1880	2013	79	G1077	364310	10.0
1881	2013	79	G1077	364312	0.0
1882	2013	79	G1077	364315	7.3
1883	2013	79	G1077	364322	6.6
1884	2013	79	G1077	364328	5.3
1885	2013	79	G1042	360147	4.5
1886	2013	79	G1042	360154	2.7
1887	2013	79	G1042	360156	7.0
1888	2013	79	G1042	360157	3.8
1913	2009	80	G1077	364291	7.0
1914	2009	80	G1077	364290	7.2
1915	2009	80	G1077	364294	7.0
1916	2009	80	G1077	364298	9.0
1917	2009	80	G1077	364289	9.8
1918	2009	80	G1077	364292	8.7
1919	2009	80	G1077	364293	8.3
1920	2010	80	G1077	360022	9.0
1921	2010	80	G1077	364304	9.5
1922	2010	80	G1077	364307	7.6
1923	2010	80	G1077	364302	5.0
1924	2010	80	G1077	364300	9.0
1925	2010	80	G1077	364303	6.2
1926	2010	80	G1077	364297	6.8
1927	2010	80	G1077	364305	9.0
1928	2010	80	G1077	364295	7.0
1929	2010	80	G1077	364296	8.9
1930	2011	80	G1077	364312	9.0
1931	2011	80	G1077	364314	5.8
1932	2011	80	G1077	364315	8.0
1933	2011	80	G1077	364322	8.2
1934	2011	80	G1077	364323	7.2
1935	2011	80	G1077	364328	6.0
1936	2011	80	G1077	364310	8.0
1937	2011	80	G1077	364308	8.3
1938	2012	80	G1077	364326	9.0
1939	2012	80	G1077	364313	7.7
1940	2012	80	G1077	364316	9.0
1941	2012	80	G1077	364317	9.9
1942	2012	80	G1077	364319	7.1
1943	2012	80	G1077	364329	9.1
1944	2012	80	G1077	364321	7.9
1945	2009	80	G1077	360027	6.0
1946	2009	80	G1077	364309	6.0
1947	2009	80	G1077	364299	6.0
1948	2009	80	G1077	364301	6.0
1949	2009	80	G1077	364288	6.0
1971	2009	81	G1077	364292	6.4
1972	2009	81	G1077	364290	6.1
1973	2009	81	G1077	364299	6.0
1974	2009	81	G1077	364294	8.0
1975	2009	81	G1077	364301	6.1
1976	2009	81	G1077	364298	5.7
1977	2009	81	G1077	364288	5.5
1978	2009	81	G1077	364289	5.9
1979	2009	81	G1077	364291	5.5
1980	2009	81	G1077	364293	5.8
1981	2010	81	G1077	364304	7.0
1982	2010	81	G1077	364302	5.4
1983	2010	81	G1077	364300	5.5
1984	2010	81	G1077	364303	5.5
1985	2010	81	G1077	364297	5.7
1986	2010	81	G1077	364305	5.0
1987	2010	81	G1077	364296	7.7
1988	2010	81	G1077	360022	6.5
1989	2010	81	G1077	364307	5.0
1990	2010	81	G1077	364295	7.0
1991	2011	81	G1077	364309	7.1
1992	2011	81	G1077	364310	6.5
1993	2011	81	G1077	364311	6.5
1994	2011	81	G1077	364312	7.0
1995	2011	81	G1077	364314	7.0
1996	2011	81	G1077	364315	6.4
1997	2011	81	G1077	364322	5.1
1998	2011	81	G1077	364323	6.3
1999	2011	81	G1077	364328	6.5
2000	2011	81	G1077	364308	5.7
2001	2012	81	G1077	364313	7.6
2002	2012	81	G1077	364316	7.6
2003	2012	81	G1077	364317	8.7
2004	2012	81	G1077	364318	6.8
2005	2012	81	G1077	364321	7.2
2006	2012	81	G1077	364327	6.5
2011	2009	82	G1042	360135	7.3
2012	2009	82	G1042	360142	7.0
2013	2009	82	G1042	360139	6.5
2014	2009	82	G1042	360136	7.6
2015	2009	82	G1042	360134	5.1
2016	2009	82	G1042	360137	5.1
2017	2010	82	G1042	360144	1.9
2018	2010	82	G1042	360145	2.4
2019	2010	82	G1042	360146	2.7
2020	2010	82	G1042	360148	1.3
2021	2010	82	G1042	360150	8.3
2022	2010	82	G1042	360153	5.2
2023	2010	82	G1042	360151	4.6
2024	2010	82	G1042	360155	5.2
2025	2010	82	G1042	360161	0.0
2026	2010	82	G1042	360152	0.0
2027	2011	82	G1042	360151	5.0
2028	2011	82	G1042	360144	5.1
2029	2011	82	G1042	360145	5.0
2030	2011	82	G1042	360148	4.3
2031	2011	82	G1042	360152	0.0
2032	2011	82	G1042	360157	0.0
2033	2011	82	G1042	360161	7.1
2034	2011	82	G1042	360146	3.2
2035	2012	82	G1042	360148	6.0
2036	2012	82	G1042	360146	5.3
2037	2012	82	G1042	360152	3.0
2038	2012	82	G1042	360154	0.0
2039	2012	82	G1042	360156	0.0
2040	2012	82	G1042	360157	1.8
2041	2012	82	G1042	360158	4.0
2042	2012	82	G1042	360159	0.0
2043	2013	82	G1042	360156	2.4
2044	2013	82	G1042	360154	0.0
2045	2013	82	G1042	360157	5.2
2046	2013	82	G1042	360158	2.7
2047	2013	82	G1042	360159	4.0
2048	2013	82	G1042	360152	5.4
2051	2009	83	G1042	360136	7.6
2052	2009	83	G1042	360135	6.2
2053	2009	83	G1042	360134	5.7
2054	2009	83	G1042	360139	8.0
2055	2009	83	G1042	360137	7.0
2056	2009	83	G1042	360138	7.2
2057	2009	83	G1042	360143	5.7
2058	2009	83	G1042	360142	7.6
2059	2009	83	G1042	360141	5.4
2060	2009	83	G1042	360140	6.4
2061	2010	83	G1042	360152	6.0
2062	2010	83	G1042	360144	5.1
2063	2010	83	G1042	360145	6.3
2064	2010	83	G1042	360146	5.1
2065	2010	83	G1042	360148	5.0
2066	2010	83	G1042	360151	7.0
2067	2010	83	G1042	360153	7.7
2068	2010	83	G1042	360155	6.0
2069	2010	83	G1042	360161	6.7
2070	2010	83	G1042	360150	7.5
2071	2011	83	G1042	360163	5.2
2072	2011	83	G1042	360147	5.0
2073	2011	83	G1042	360149	5.8
2074	2011	83	G1042	360154	2.9
2075	2011	83	G1042	360156	7.7
2076	2011	83	G1042	360157	6.1
2077	2011	83	G1042	360158	5.0
2078	2011	83	G1042	360159	5.8
2079	2011	83	G1042	360160	5.2
2080	2011	83	G1042	360162	7.1
2081	2012	83	G1042	364344	6.1
2082	2012	83	G1042	364345	7.0
2083	2012	83	G1042	364346	8.2
2084	2012	83	G1042	364204	8.3
2085	2012	83	G1042	364203	5.4
2086	2012	83	G1042	364211	5.0
2087	2012	83	G1042	360154	6.8
2088	2012	83	G1042	363031	10.0
2107	2009	84	G1077	364298	8.0
2108	2009	84	G1077	364290	5.0
2109	2009	84	G1077	364299	6.5
2110	2009	84	G1077	364301	6.5
2111	2009	84	G1077	364288	7.7
2112	2009	84	G1077	364289	5.1
2113	2009	84	G1077	364293	5.2
2114	2009	84	G1077	364292	7.7
2115	2009	84	G1077	364291	7.6
2116	2009	84	G1077	364294	6.7
2117	2010	84	G1077	364296	5.4
2118	2010	84	G1077	364304	7.5
2119	2010	84	G1077	360022	6.5
2120	2010	84	G1077	364307	5.7
2121	2010	84	G1077	364297	3.6
2122	2010	84	G1077	364295	4.6
2123	2010	84	G1077	364305	5.0
2124	2010	84	G1077	364302	6.6
2125	2010	84	G1077	364300	7.0
2126	2010	84	G1077	364303	6.1
2127	2011	84	G1077	364323	6.0
2128	2011	84	G1077	364295	5.9
2129	2011	84	G1077	364297	4.9
2130	2011	84	G1077	364308	7.8
2131	2011	84	G1077	364309	6.2
2132	2011	84	G1077	364310	4.6
2133	2011	84	G1077	364311	3.5
2134	2011	84	G1077	364312	7.7
2135	2011	84	G1077	364314	5.7
2136	2011	84	G1077	364328	4.2
2137	2011	84	G1077	364315	6.1
2138	2012	84	G1077	364328	6.0
2139	2012	84	G1077	364297	4.9
2140	2012	84	G1077	364310	4.8
2141	2012	84	G1077	364322	6.0
2142	2012	84	G1077	364311	5.5
2163	2009	85	G1077	364294	7.0
2164	2009	85	G1077	364301	7.3
2165	2009	85	G1077	364298	7.0
2166	2009	85	G1077	364288	6.4
2167	2009	85	G1077	364289	7.1
2168	2009	85	G1077	364293	7.3
2169	2009	85	G1077	364292	6.5
2170	2009	85	G1077	364291	6.8
2171	2009	85	G1077	364299	7.1
2172	2009	85	G1077	364290	7.6
2173	2010	85	G1077	364302	5.2
2174	2010	85	G1077	364305	6.3
2175	2010	85	G1077	364300	6.5
2176	2010	85	G1077	364297	8.7
2177	2010	85	G1077	364295	5.0
2178	2010	85	G1077	364296	7.8
2179	2010	85	G1077	364304	10.0
2180	2010	85	G1077	360022	9.0
2181	2010	85	G1077	364307	6.6
2182	2010	85	G1077	364303	7.0
2183	2011	85	G1077	364323	5.5
2184	2011	85	G1077	364328	6.5
2185	2011	85	G1077	364314	6.4
2186	2011	85	G1077	364322	7.0
2187	2011	85	G1077	364315	7.2
2188	2011	85	G1077	364308	8.1
2189	2011	85	G1077	364309	8.2
2190	2011	85	G1077	364310	7.5
2191	2011	85	G1077	364311	7.2
2192	2011	85	G1077	364312	7.4
2193	2012	85	G1077	364313	7.9
2194	2012	85	G1077	364316	7.7
2195	2012	85	G1077	364317	9.3
2196	2012	85	G1077	364318	8.5
2197	2012	85	G1077	364320	9.0
2198	2012	85	G1077	364324	7.5
2199	2012	85	G1077	364329	8.3
2200	2009	86	G1042	360141	6.2
2201	2009	86	G1042	360142	7.8
2202	2009	86	G1042	360140	5.9
2203	2009	86	G1042	360139	5.5
2204	2009	86	G1042	360138	6.4
2205	2009	86	G1042	360137	7.0
2206	2009	86	G1042	360134	6.2
2207	2009	86	G1042	360136	7.2
2208	2009	86	G1042	360135	5.8
2209	2009	86	G1042	360143	5.0
2210	2010	86	G1042	360146	3.0
2211	2010	86	G1042	360144	5.1
2212	2010	86	G1042	360148	5.4
2213	2010	86	G1042	360145	5.0
2214	2010	86	G1042	360150	7.8
2215	2010	86	G1042	360151	4.5
2216	2010	86	G1042	360152	4.3
2217	2010	86	G1042	360153	5.7
2218	2010	86	G1042	360155	5.4
2219	2010	86	G1042	360161	7.4
2220	2011	86	G1042	360146	6.4
2221	2011	86	G1042	360147	3.5
2222	2011	86	G1042	360149	5.2
2223	2011	86	G1042	360151	5.1
2224	2011	86	G1042	360152	6.7
2225	2011	86	G1042	360154	2.6
2226	2011	86	G1042	360158	0.8
2227	2011	86	G1042	360159	4.4
2228	2011	86	G1042	360160	5.2
2229	2011	86	G1042	360163	4.5
2230	2011	86	G1042	360162	5.3
2231	2012	86	G1042	360156	6.4
2232	2012	86	G1042	360158	6.0
2233	2012	86	G1042	360159	6.3
2234	2012	86	G1042	360163	7.5
2235	2012	86	G1042	361842	9.3
2236	2012	86	G1042	361845	7.9
2237	2012	86	G1042	361853	9.0
2238	2012	86	G1042	360154	6.7
2239	2012	86	G1042	360157	2.1
2240	2012	86	G1042	360147	7.5
2241	2013	86	G1042	360157	7.5
2242	2013	86	G1042	361843	9.0
2243	2013	86	G1042	361849	8.7
2244	2013	86	G1042	363031	9.5
2245	2013	86	G1042	364207	7.5
2246	2013	86	G1042	364213	9.0
2248	2011	87	G1042	360136	5.8
2249	2011	87	G1042	360137	5.5
2250	2011	87	G1042	360138	7.5
2251	2011	87	G1042	360140	2.1
2252	2011	87	G1042	360143	1.5
2253	2012	87	G1042	360143	2.5
2254	2012	87	G1042	360134	8.5
2255	2012	87	G1042	360140	5.0
2256	2012	87	G1042	360139	0.0
2257	2013	87	G1042	360135	0.0
2258	2013	87	G1042	360139	0.0
2259	2013	87	G1042	360141	0.0
2260	2013	87	G1042	360143	0.0
2261	2013	87	G1042	360145	0.0
2262	2013	87	G1042	360150	0.0
2263	2009	88	G1077	364294	0.0
2264	2009	88	G1077	364301	0.0
2265	2009	88	G1077	364298	0.0
2266	2009	88	G1077	364288	0.0
2267	2009	88	G1077	364289	0.0
2268	2009	88	G1077	364293	0.4
2269	2009	88	G1077	364292	3.9
2270	2009	88	G1077	364291	0.0
2271	2009	88	G1077	364290	0.0
2272	2009	88	G1077	364299	0.0
2288	2009	89	G1077	364291	3.8
2289	2009	89	G1077	364298	7.1
2290	2009	89	G1077	364290	5.2
2291	2009	89	G1077	364299	6.0
2292	2009	89	G1077	364294	6.3
2293	2009	89	G1077	364301	6.0
2294	2009	89	G1077	364288	5.0
2295	2009	89	G1077	364293	4.5
2296	2009	89	G1077	364292	5.3
2297	2010	89	G1077	364303	5.3
2298	2010	89	G1077	364291	3.0
2299	2010	89	G1077	364300	5.0
2300	2010	89	G1077	364297	6.6
2301	2010	89	G1077	364305	5.0
2302	2010	89	G1077	364295	3.5
2303	2010	89	G1077	364304	9.0
2304	2010	89	G1077	360022	6.5
2305	2010	89	G1077	364307	0.0
2306	2010	89	G1077	364293	2.0
2307	2011	89	G1077	364291	5.1
2308	2011	89	G1077	364293	6.3
2309	2011	89	G1077	364295	7.1
2310	2011	89	G1077	364322	5.0
2311	2011	89	G1077	364302	5.1
2312	2011	89	G1077	364307	3.5
2313	2011	89	G1077	364315	7.4
2314	2011	89	G1077	364296	7.3
2315	2011	89	G1077	364328	5.5
2316	2011	89	G1077	364314	3.0
2317	2012	89	G1077	364323	5.6
2318	2012	89	G1077	364316	8.4
2319	2012	89	G1077	364307	6.0
2320	2012	89	G1077	364308	6.3
2321	2012	89	G1077	364309	8.0
2322	2012	89	G1077	364310	5.8
2323	2012	89	G1077	364311	5.3
2324	2012	89	G1077	364312	5.1
2325	2012	89	G1077	364313	8.0
2326	2012	89	G1077	364314	7.0
2327	2013	89	G1077	399101	6.0
2328	2013	89	G1077	364318	9.0
2329	2013	89	G1077	399102	7.5
2330	2013	89	G1077	399103	5.0
2331	2013	89	G1077	399104	7.5
2332	2013	89	G1077	364317	9.4
2333	2009	90	G1042	360137	0.0
2334	2009	90	G1042	360143	0.0
2335	2009	90	G1042	360142	0.0
2336	2009	90	G1042	360141	0.0
2337	2009	90	G1042	360140	0.0
2338	2009	90	G1042	360138	0.0
2339	2009	90	G1042	360136	0.0
2340	2009	90	G1042	360135	0.0
2341	2009	90	G1042	360134	0.0
2342	2009	90	G1042	360139	0.0
2362	2009	92	G1077	364290	5.2
2363	2009	92	G1077	364299	6.5
2364	2009	92	G1077	364294	6.0
2365	2009	92	G1077	364288	6.7
2366	2009	92	G1077	364301	6.4
2367	2009	92	G1077	364289	7.8
2368	2009	92	G1077	364293	7.2
2369	2009	92	G1077	364292	6.8
2370	2009	92	G1077	364291	6.4
2371	2009	92	G1077	364298	5.0
2372	2010	92	G1077	364297	6.9
2373	2010	92	G1077	364305	7.0
2374	2010	92	G1077	364295	3.5
2375	2010	92	G1077	364296	6.7
2376	2010	92	G1077	364304	9.0
2377	2010	92	G1077	360022	6.5
2378	2010	92	G1077	364302	5.0
2379	2010	92	G1077	364307	6.5
2380	2010	92	G1077	364303	6.2
2381	2010	92	G1077	364300	7.0
2382	2011	92	G1077	364315	7.4
2383	2011	92	G1077	364308	6.2
2384	2011	92	G1077	364309	8.0
2385	2011	92	G1077	364310	7.5
2386	2011	92	G1077	364311	6.8
2387	2011	92	G1077	364314	5.5
2388	2011	92	G1077	364322	7.6
2389	2011	92	G1077	364323	6.5
2390	2011	92	G1077	364328	5.7
2391	2011	92	G1077	364312	7.8
2392	2011	92	G1077	364295	8.6
2393	2012	92	G1077	364316	8.1
2394	2012	92	G1077	364317	8.5
2395	2012	92	G1077	364324	7.5
2396	2012	92	G1077	364325	6.4
2397	2012	92	G1077	364326	9.0
2398	2012	92	G1077	364327	6.7
2399	2012	92	G1077	364329	8.6
2400	2012	92	G1077	364313	6.3
2411	2010	93	G1042	360137	6.7
2412	2010	93	G1042	360144	5.0
2413	2010	93	G1042	360142	7.7
2414	2010	93	G1042	360146	2.0
2415	2010	93	G1042	360148	2.9
2416	2010	93	G1042	360150	8.2
2417	2010	93	G1042	360151	4.5
2418	2010	93	G1042	360152	0.0
2419	2010	93	G1042	360153	5.9
2420	2010	93	G1042	360161	7.0
2421	2011	93	G1042	360145	3.4
2422	2011	93	G1042	360146	4.1
2423	2011	93	G1042	360148	5.8
2424	2011	93	G1042	360149	0.0
2425	2011	93	G1042	360151	5.0
2426	2011	93	G1042	360152	6.0
2427	2011	93	G1042	360155	3.4
2428	2011	93	G1042	360159	0.0
2429	2011	93	G1042	360162	5.0
2430	2012	93	G1042	360149	1.5
2431	2012	93	G1042	360146	6.3
2432	2012	93	G1042	360155	0.0
2433	2012	93	G1042	360156	2.5
2434	2012	93	G1042	360159	4.0
2435	2012	93	G1042	364211	5.8
2436	2012	93	G1042	360145	5.1
2437	2013	93	G1042	364204	9.9
2438	2013	93	G1042	360163	4.0
2439	2013	93	G1042	360149	4.0
2440	2013	93	G1042	360155	2.8
2441	2013	93	G1042	360156	5.9
2442	2013	93	G1042	360158	5.0
2443	2013	93	G1042	360159	5.3
2460	2009	94	G1077	364301	5.2
2461	2009	94	G1077	364290	5.8
2462	2009	94	G1077	364294	5.7
2463	2009	94	G1077	364298	5.4
2464	2009	94	G1077	364288	5.0
2465	2009	94	G1077	364289	6.5
2466	2009	94	G1077	364293	6.6
2467	2009	94	G1077	364292	8.7
[truncated: 17,622 more rows]
